# Supplementary material
Source: PubMed Central journal article supplement (PMC7154960)
Supplement: jamapediatr-174-e200268-s001.pdf [file jamapediatr-174-e200268-s001.pdf]

## Supplementary Online Content

Klugman D, Melton K, Maynard PO, et al. Assessment of an unplanned extubation bundle to reduce unplanned extubations in critically ill neonates, infants, and children. *JAMA Pediatr*. Published online April 13, 2020. doi:10.1001/jamapediatrics.2020.0268

**eAppendix 1.** Unplanned extubations key driver diagram

**eAppendix 2.** Unplanned extubation real-time ACA event investigation

This supplementary material has been provided by the authors to give readers additional information about their work.

**eAppendix 1. Unplanned extubations key driver diagram**

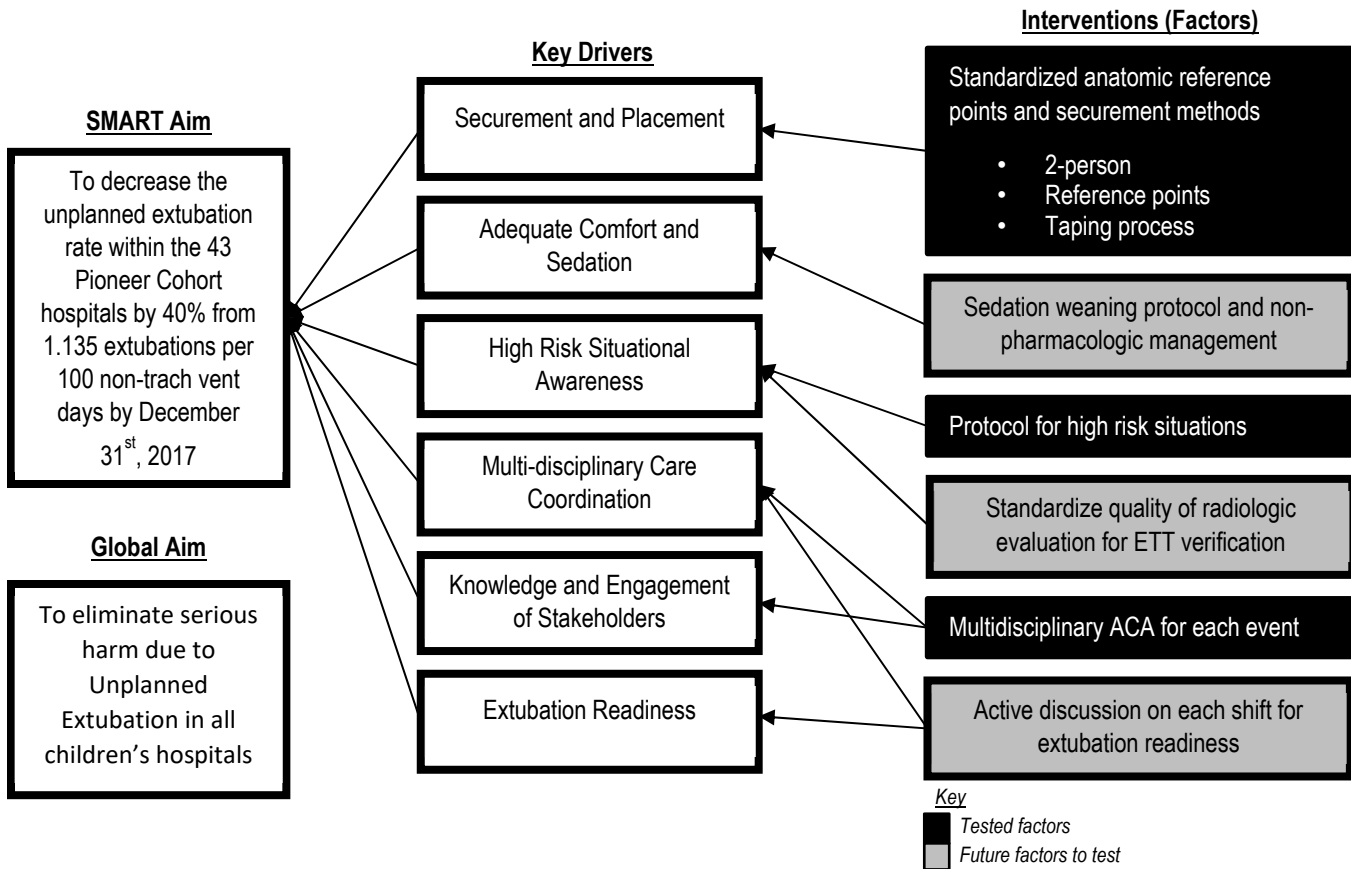

## eAppendix 2. Unplanned extubation real-time ACA event investigation

Date of UE event: \_\_\_\_\_

Was ACA captured in real-time? Yes  No

Was event reviewed in one week? Yes  No

Unit: NICU  PICU  CICU  Other

### Type of UE:

No reintubation within 1 hr

With reintubation within 1 hr

Other\*

History of prior UE? Yes  No

### Airway/ETT:

Type of intubation Nasal  Oral

HFV Yes  No

### Uncuffed/Cuffed

Uncuffed

Cuffed-Inflated

Cuffed-Deflated

Tape secure Yes  No

### ETT location

Corner of mouth

Center of mouth

Nasal

### Inline (closed) suction apparatus present

Yes  No  N/A

### Phase of treatment

Acute (care is escalating or static)

Weaning (patient is improving and ventilator settings are de-escalating)

Awaiting extubation

\*With reintubation and cardiovascular collapse requiring CPR and/or bolus epinephrine within 1 hour.

### Sedation

#### Sedation:

Continuous  Scheduled  PRN  None

Agitation (inadequate pain control/agitation) Yes  No

Staffing 1:1:  1:2  >1:2

### Contributors to UE

|                                              | Yes                      | No                       |
|----------------------------------------------|--------------------------|--------------------------|
| Inadequate restraints                        | <input type="checkbox"/> | <input type="checkbox"/> |
| Loose tape                                   | <input type="checkbox"/> | <input type="checkbox"/> |
| Inadequate sedation                          | <input type="checkbox"/> | <input type="checkbox"/> |
| Inadequate staffing                          | <input type="checkbox"/> | <input type="checkbox"/> |
| Improper staffing handoff                    | <input type="checkbox"/> | <input type="checkbox"/> |
| Within 1 <sup>st</sup> hour of ICU admission | <input type="checkbox"/> | <input type="checkbox"/> |

Other contributor: \_\_\_\_\_

### Activities occurring at time of extubation

|                                             | Yes                      | No                       |
|---------------------------------------------|--------------------------|--------------------------|
| Kangaroo care or parent hold                | <input type="checkbox"/> | <input type="checkbox"/> |
| Radiology study (xray, U/S, echo, etc.)     | <input type="checkbox"/> | <input type="checkbox"/> |
| Respiratory treatment                       | <input type="checkbox"/> | <input type="checkbox"/> |
| ETT adjustment/Re-taping ETT                | <input type="checkbox"/> | <input type="checkbox"/> |
| Weighing                                    | <input type="checkbox"/> | <input type="checkbox"/> |
| Position change                             | <input type="checkbox"/> | <input type="checkbox"/> |
| Transport                                   | <input type="checkbox"/> | <input type="checkbox"/> |
| Suctioning                                  | <input type="checkbox"/> | <input type="checkbox"/> |
| <2 caregivers for positioning or suctioning | <input type="checkbox"/> | <input type="checkbox"/> |
| Bathing                                     | <input type="checkbox"/> | <input type="checkbox"/> |
| Line placement                              | <input type="checkbox"/> | <input type="checkbox"/> |
| Blood draw                                  | <input type="checkbox"/> | <input type="checkbox"/> |
| Other bedside invasive procedure            | <input type="checkbox"/> | <input type="checkbox"/> |

Other activity: \_\_\_\_\_

### Results of UE event

|                                            | Yes                      | No                       |
|--------------------------------------------|--------------------------|--------------------------|
| Arrhythmia                                 | <input type="checkbox"/> | <input type="checkbox"/> |
| BP change required intervention            | <input type="checkbox"/> | <input type="checkbox"/> |
| Need for increased vent support or FI02    | <input type="checkbox"/> | <input type="checkbox"/> |
| Heart Rate <60 (verify in central monitor) | <input type="checkbox"/> | <input type="checkbox"/> |
| Chest compressions                         | <input type="checkbox"/> | <input type="checkbox"/> |
| Code medications given                     | <input type="checkbox"/> | <input type="checkbox"/> |
